# Supplementary material for: Gentiana capitata Buch.–Ham. ex D.Don Cell Suspension Culture as a New Source of Isosaponarin and 3,7,8-Trimethoxy-9-oxo-9H-xanthen-1-yl 6-O-β-D-ribopyranosyl-β-D-allopyranoside and Their Effect on PC-12 Cell Viability
Source: MDPI journal article supplement (doi:10.3390/ijms25168576), 2024-08-06
Supplement: s1 [file s1]

The entire structure elucidation report  
and the elucidation protocol from the  
ACD/SE Suite tool (Advanced  
Chemistry Development, Inc.  
(ACD/Labs), Toronto, ON, Canada,  
[www.acdlabs.com](http://www.acdlabs.com)) for **compound 2**

# Structure Elucidation Report for compound 2

## Initial Data

### Composition Restrictions:

Molecular Weight = 0.000-1000.000

Double Bonds Equivalent = 0.00-100.00

Allowed Composition = C(0-100) H(0-100) O(0-20) N(0-10)

Molecular Formula = C<sub>27</sub>H<sub>30</sub>O<sub>15</sub>

### Spectral Data:

standard <sup>1</sup>H - 12 peaks

merged <sup>1</sup>H - 18 peaks

standard <sup>13</sup>C - 25 peaks

merged <sup>13</sup>C - 25 peaks

COSY <sup>1</sup>H-<sup>1</sup>H - 26 peaks

HSQC-DEPT <sup>13</sup>C-<sup>1</sup>H - 18 peaks

HMBC <sup>13</sup>C-<sup>1</sup>H - 47 peaks

## Most Probable Structure

Following structure has been placed to the first position after spectra calculation

## Carbon Assignment

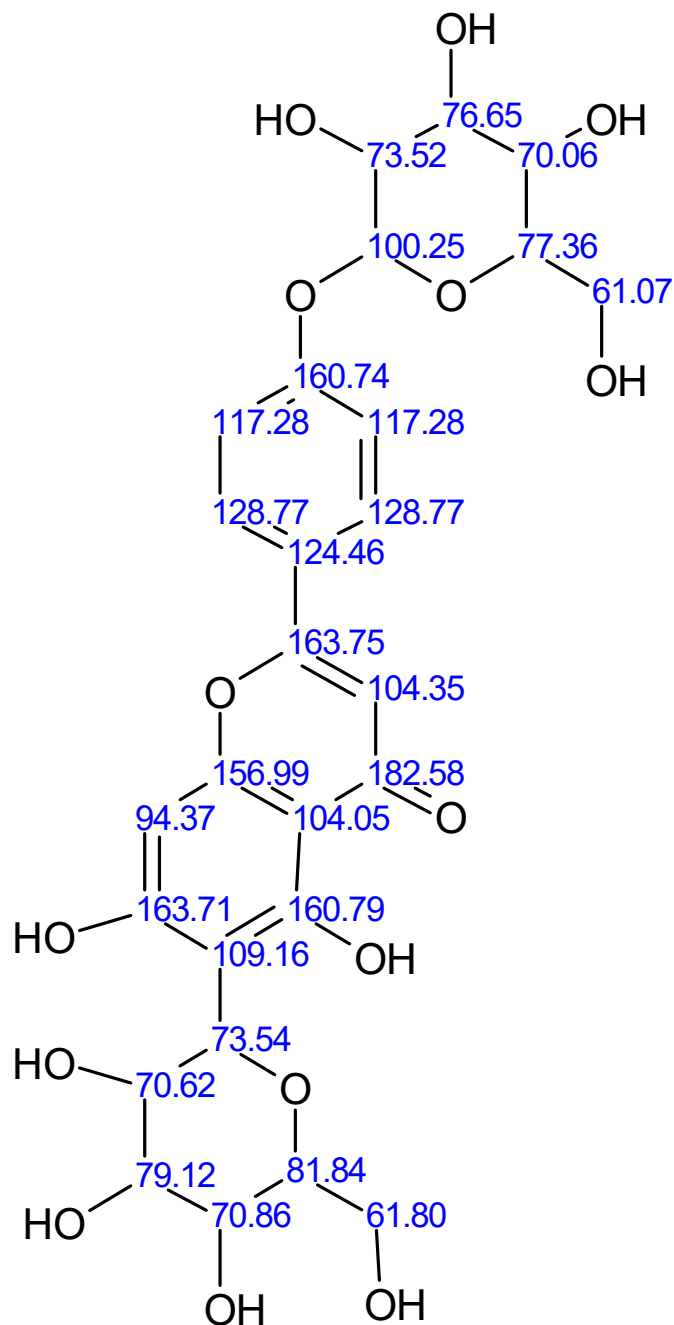

| #  | N     | Shift (ppm) | Atoms | XHn    |
|----|-------|-------------|-------|--------|
| 1  | 1     | 61.067      | 1     | CH2(t) |
| 2  | 2     | 61.803      | 1     | CH2(t) |
| 3  | 3     | 70.060      | 1     | CH(d)  |
| 4  | 4     | 70.621      | 1     | CH(d)  |
| 5  | 5     | 70.857      | 1     | CH(d)  |
| 6  | 6     | 73.520      | 1     | CH(d)  |
| 7  | 7     | 73.539      | 1     | CH(d)  |
| 8  | 8     | 76.654      | 1     | CH(d)  |
| 9  | 9     | 77.363      | 1     | CH(d)  |
| 10 | 10    | 79.122      | 1     | CH(d)  |
| 11 | 11    | 81.839      | 1     | CH(d)  |
| 12 | 12    | 94.370      | 1     | CH(d)  |
| 13 | 13    | 100.246     | 1     | CH(d)  |
| 14 | 19    | 104.055     | 1     | C(s)   |
| 15 | 14    | 104.350     | 1     | CH(d)  |
| 16 | 20    | 109.158     | 1     | C(s)   |
| 17 | 15,16 | 117.278     | 2     | CH(d)  |
| 18 | 21    | 124.462     | 1     | C(s)   |
| 19 | 17,18 | 128.769     | 2     | CH(d)  |
| 20 | 22    | 156.989     | 1     | C(s)   |
| 21 | 23    | 160.736     | 1     | C(s)   |
| 22 | 24    | 160.790     | 1     | C(s)   |
| 23 | 25    | 163.710     | 1     | C(s)   |
| 24 | 26    | 163.748     | 1     | C(s)   |

### Proton Assignment

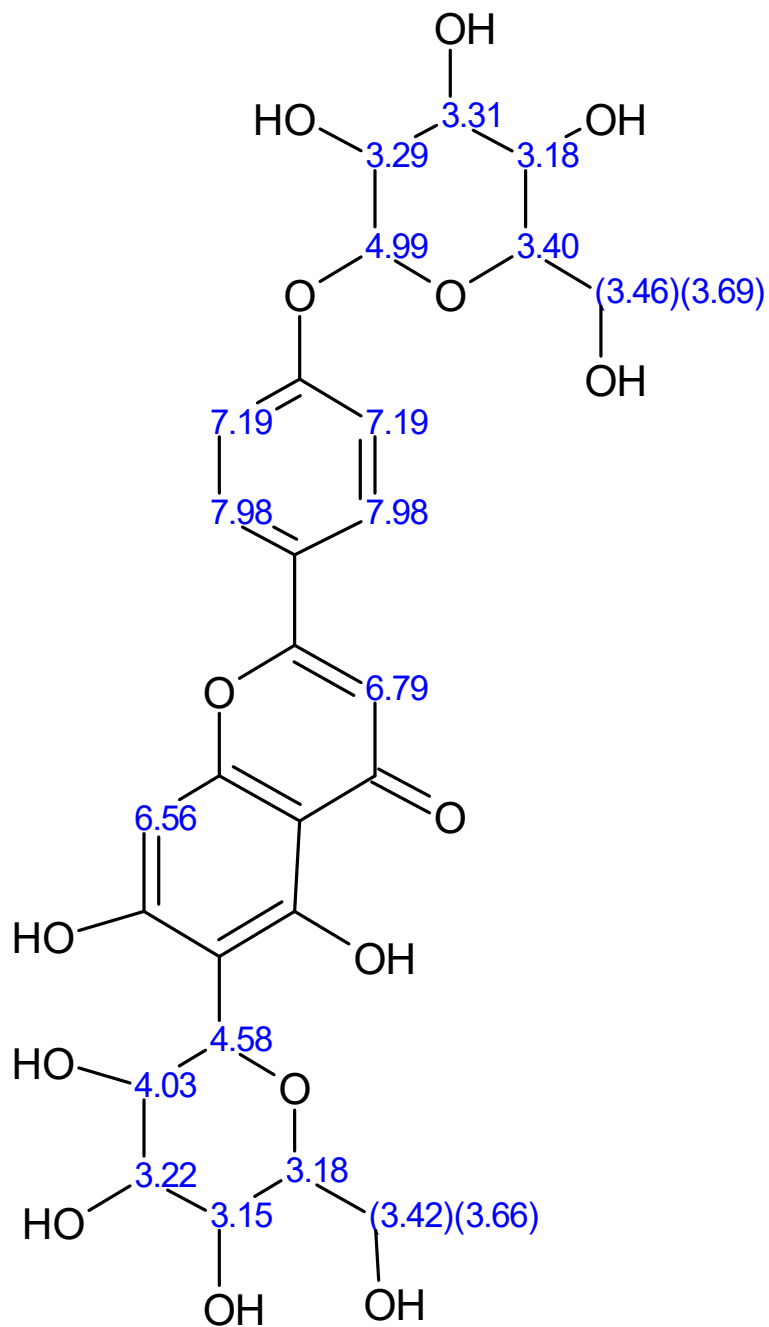

| #  | N     | Mark | Shift (ppm) | Protons |
|----|-------|------|-------------|---------|
| 1  | 5     |      | 3.155       | 1       |
| 2  | 11    |      | 3.177       | 1       |
| 3  | 3     |      | 3.178       | 1       |
| 4  | 10    |      | 3.216       | 1       |
| 5  | 6     |      | 3.286       | 1       |
| 6  | 8     |      | 3.312       | 1       |
| 7  | 9     |      | 3.400       | 1       |
| 8  | 2     |      | 3.415       | 1       |
| 9  | 1     |      | 3.465       | 1       |
| 10 | 2     |      | 3.661       | 1       |
| 11 | 1     |      | 3.691       | 1       |
| 12 | 4     |      | 4.026       | 1       |
| 13 | 7     |      | 4.583       | 1       |
| 14 | 13    |      | 4.994       | 1       |
| 15 | 12    |      | 6.556       | 1       |
| 16 | 14    |      | 6.792       | 1       |
| 17 | 15,16 |      | 7.189       | 1       |

## Generated Structures

1 (ID=262)

The Best Structure

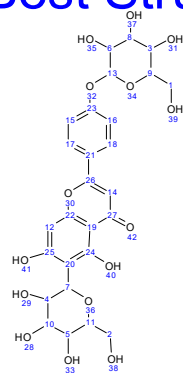

$d_N(^{13}C+^1H)$ : 3.779

2 (ID=331)

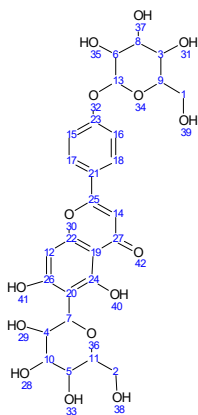

$d_N(^{13}C+^1H)$ : 3.782

3 (ID=107)

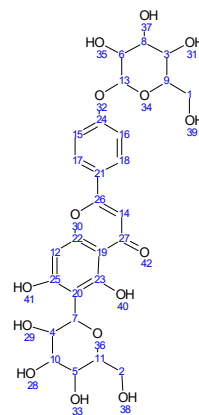

$d_N(^{13}C+^1H)$ : 3.783

4 (ID=166)

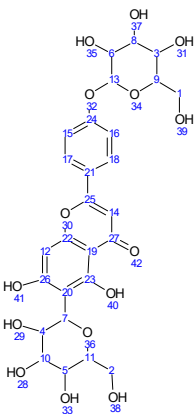

$d_N(^{13}C+^1H)$ : 3.786

5 (ID=327)

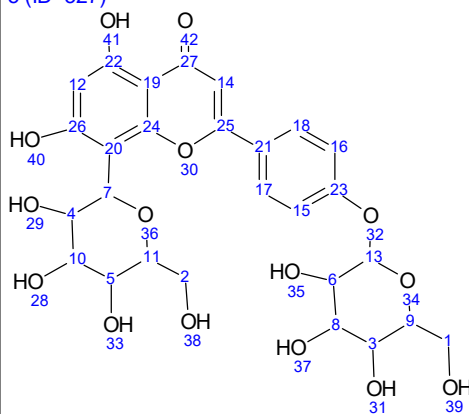

$d_N(^{13}C+^1H)$ : 4.339

6 (ID=162)

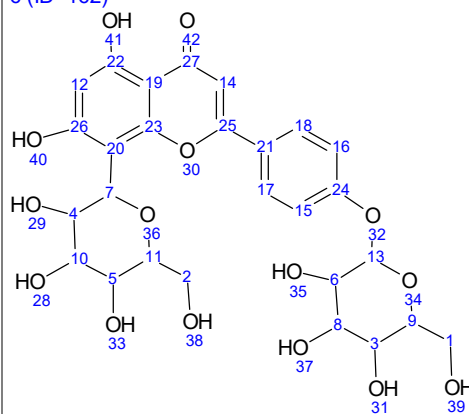

$d_N(^{13}C+^1H)$ : 4.339

# Structure Elucidation Report for compound 2 Page 5)

7 (ID=258)

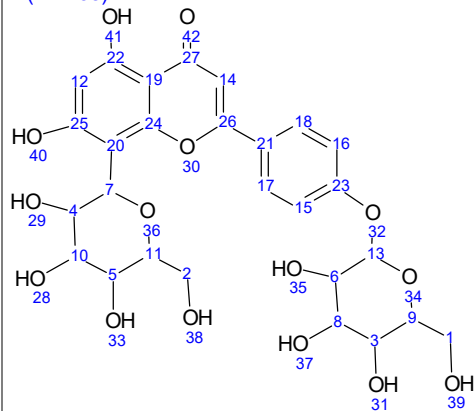

$d_N(^{13}C+^1H)$ : 4.341

8 (ID=103)

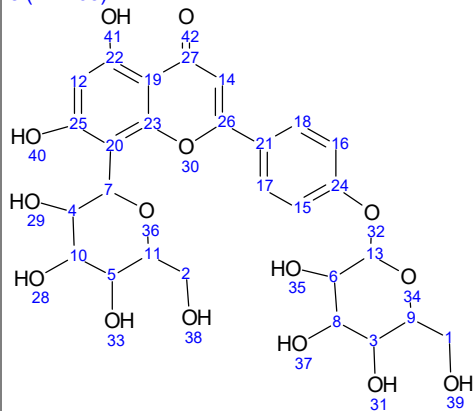

$d_N(^{13}C+^1H)$ : 4.341

9 (ID=257)

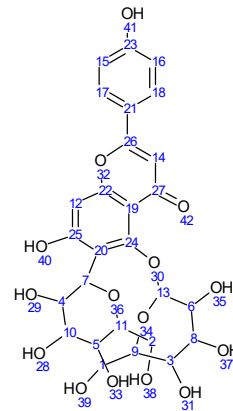

$d_N(^{13}C+^1H)$ : 4.889

10 (ID=102)

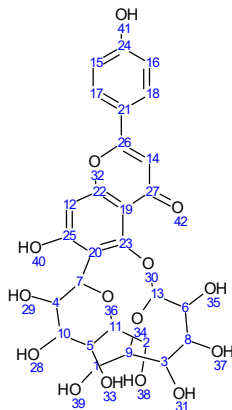

$d_N(^{13}C+^1H)$ : 4.889

11 (ID=326)

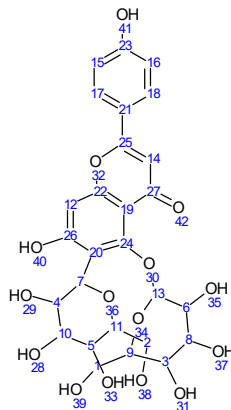

$d_N(^{13}C+^1H)$ : 4.892

12 (ID=161)

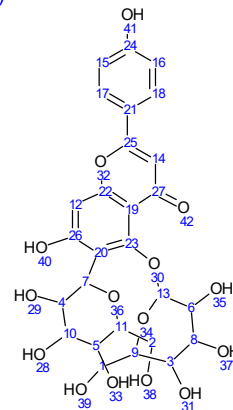

$d_N(^{13}C+^1H)$ : 4.892

# Structure Elucidation Report for compound 2 Page 6)

13 (ID=255)

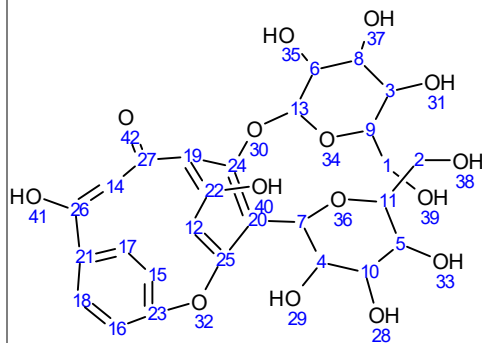

$d_N(^{13}C+^1H)$ : 6.518

14 (ID=100)

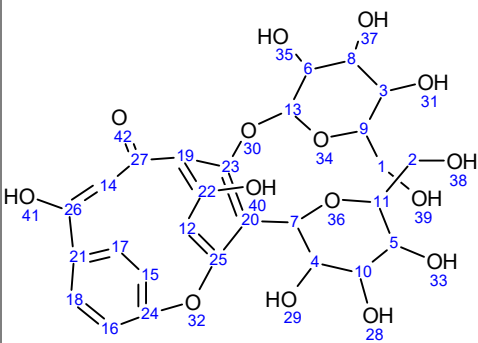

$d_N(^{13}C+^1H)$ : 6.518

15 (ID=324)

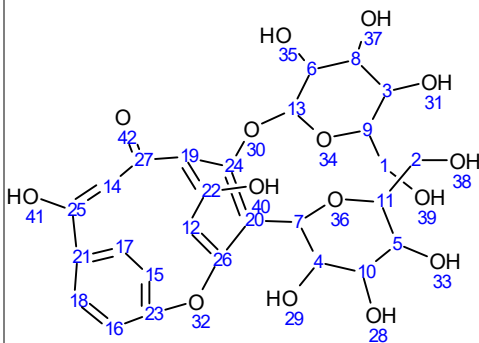

$d_N(^{13}C+^1H)$ : 6.521

16 (ID=159)

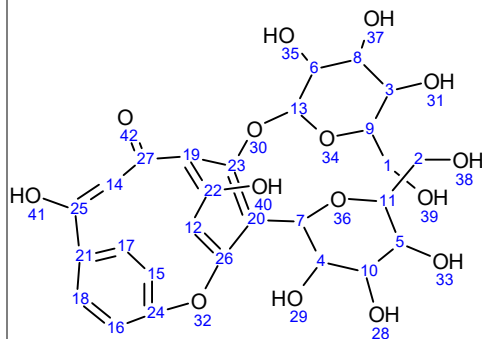

$d_N(^{13}C+^1H)$ : 6.521

17 (ID=330)

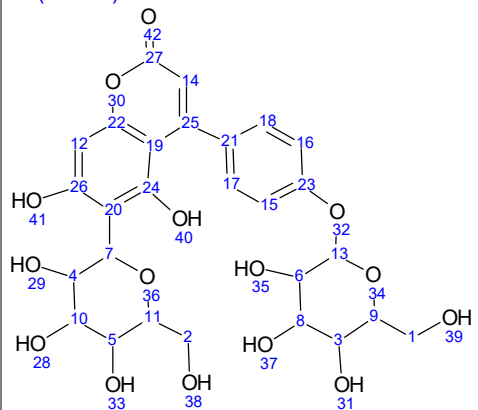

$d_N(^{13}C+^1H)$ : 6.806

18 (ID=165)

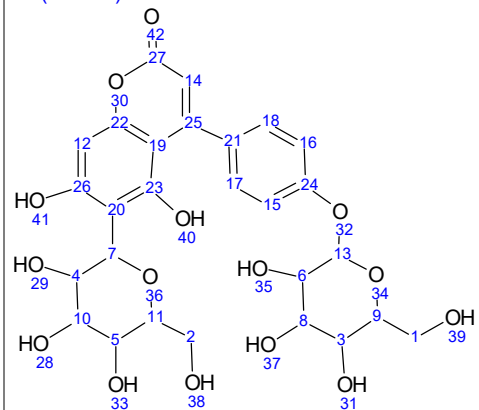

$d_N(^{13}C+^1H)$ : 6.806

## Structure Elucidation Report for compound 2 (Page 7)

|                                                                                                       |                                                                                                        |                                                                                                         |
|-------------------------------------------------------------------------------------------------------|--------------------------------------------------------------------------------------------------------|---------------------------------------------------------------------------------------------------------|
| <p>19 (ID=261)</p> 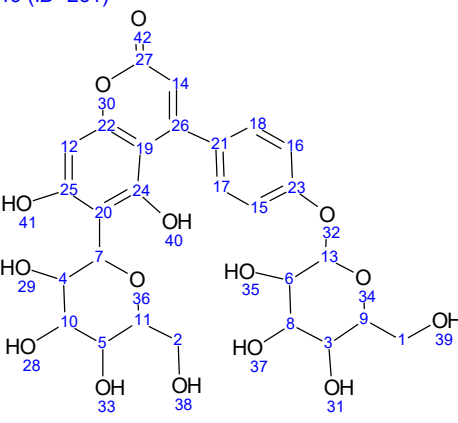  | <p>20 (ID=106)</p>   | <p>21 (ID=337)</p>   |
| <p><math>d_N(^{13}C+^1H)</math>: 6.806</p>                                                            | <p><math>d_N(^{13}C+^1H)</math>: 6.806</p>                                                             | <p><math>d_N(^{13}C+^1H)</math>: 7.212</p>                                                              |
| <p>22 (ID=270)</p>  | <p>23 (ID=172)</p>  | <p>24 (ID=113)</p>  |
| <p><math>d_N(^{13}C+^1H)</math>: 7.212</p>                                                            | <p><math>d_N(^{13}C+^1H)</math>: 7.212</p>                                                             | <p><math>d_N(^{13}C+^1H)</math>: 7.212</p>                                                              |

## Appendix (Additional Data)

### Experimental Spectra Data

standard 1H



# Structure Elucidation Report for compound 2 Page 8)

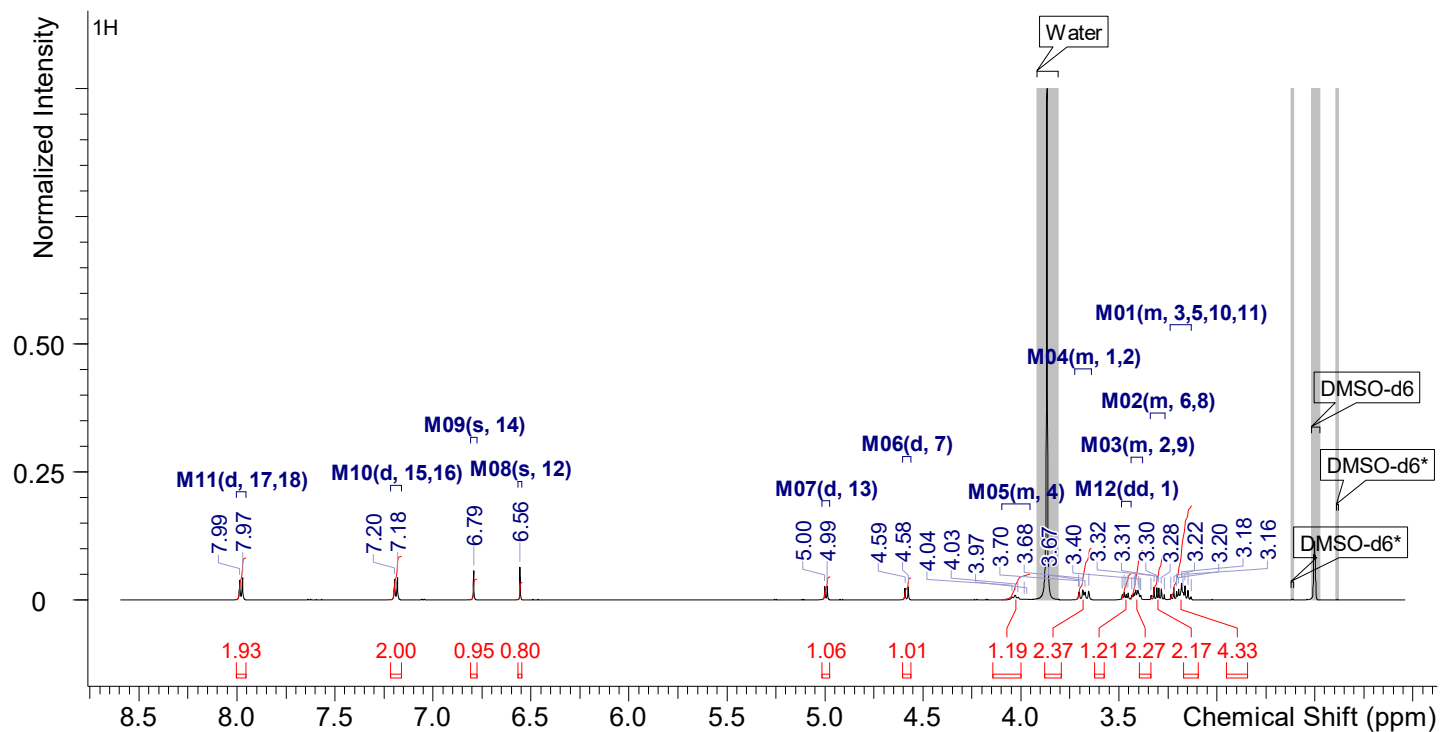

## standard 13C

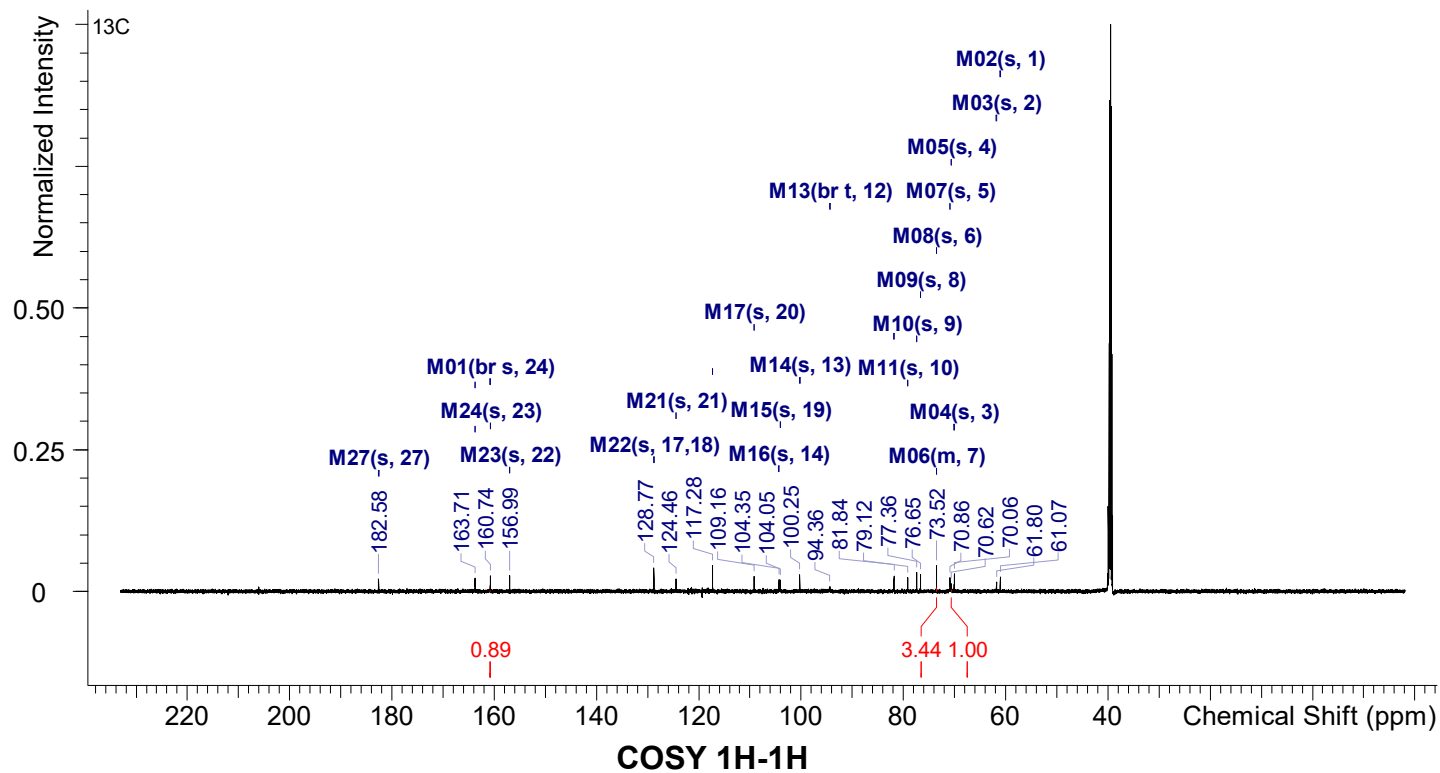

# Structure Elucidation Report for compound 2 Page 9)

cosy.fid.esp

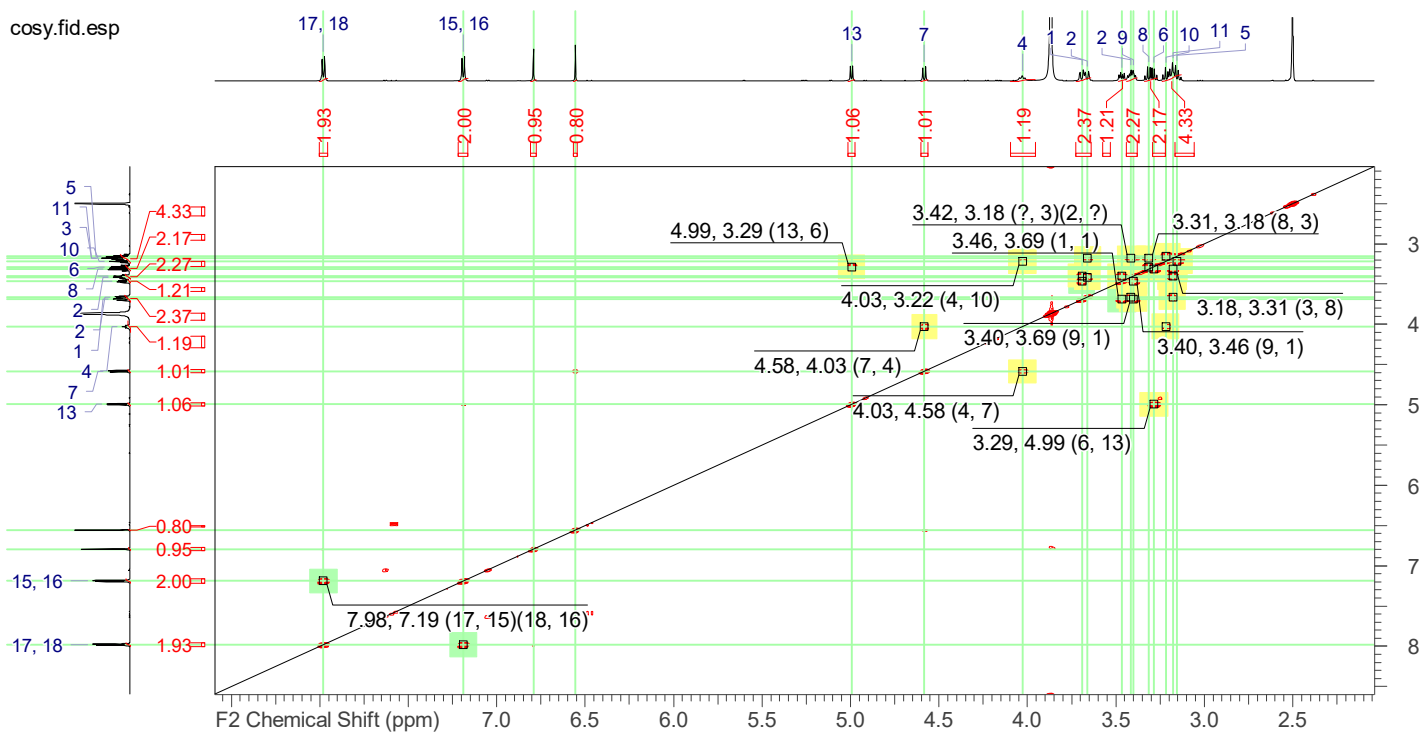

hscq.fid.esp

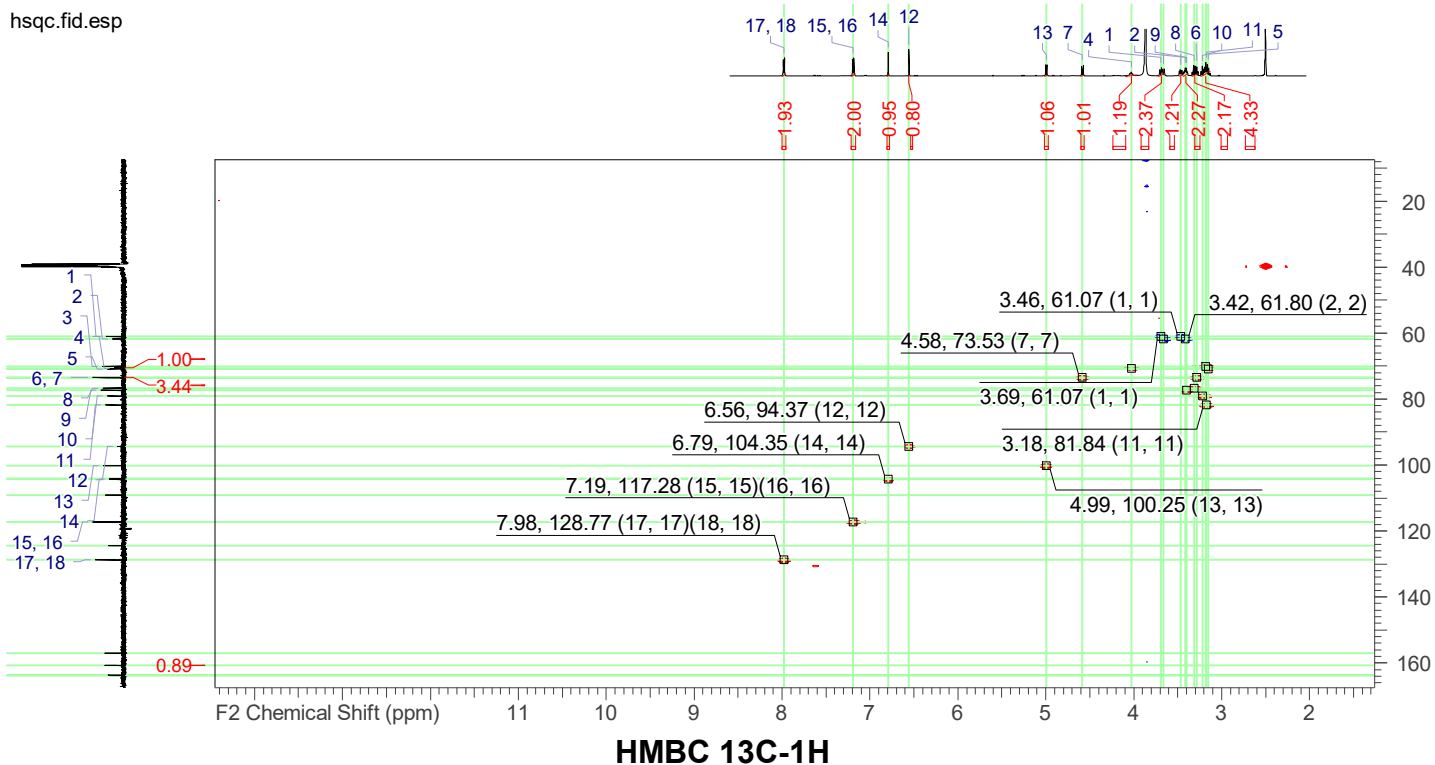

## Structure Elucidation Report for compound 2 Page 10)

hmbc.fid.esp

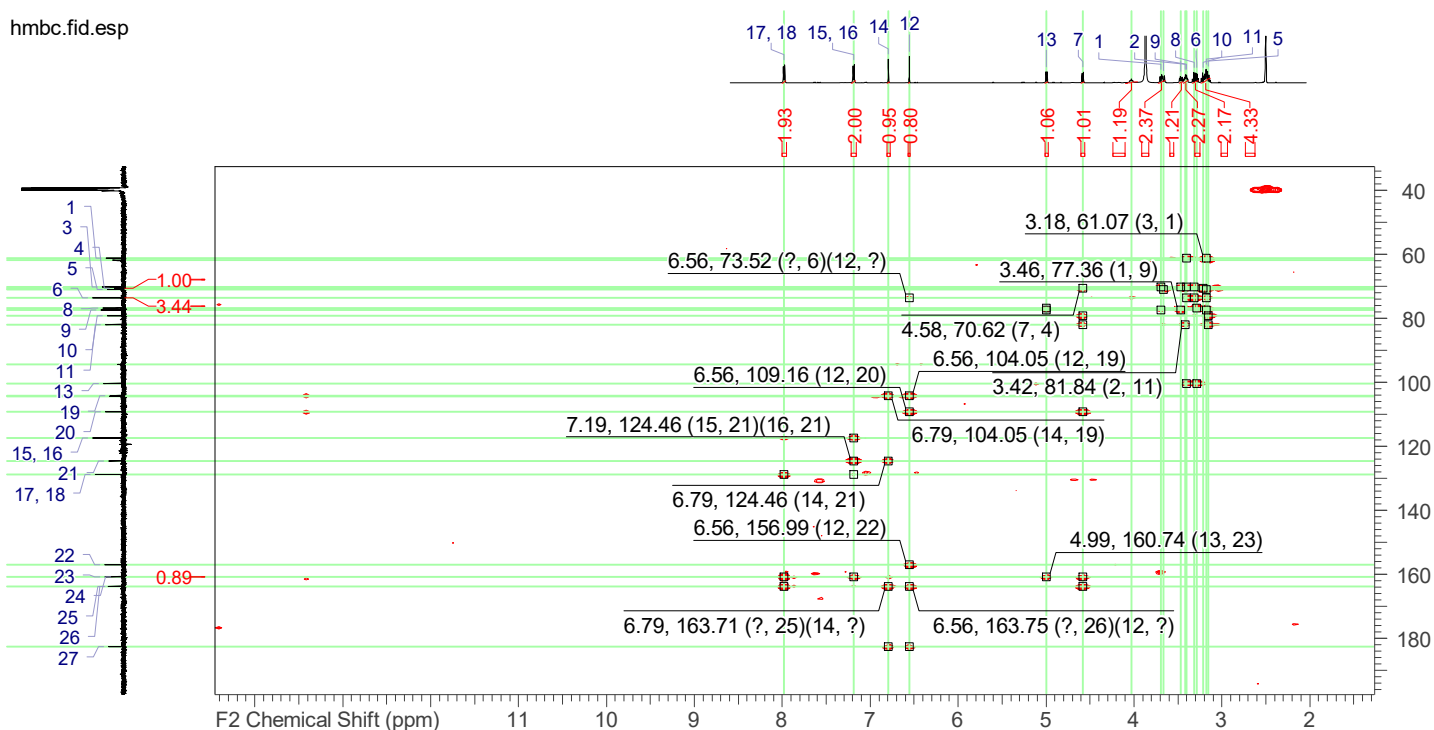

## Elucidation Protocol

Start: Structure Generation 09/22/2023 10:24:27

Correlation Spectroscopy Based Structure Generator options:

Keep Generated Structures = Yes

Clear Generated Structures List Before Generation = Yes

Add Structures Already Existing in Generated Structures List = No

Transfer Spectra to Generated Structures = Yes

Use Assignment when Removing Duplicates = Yes

Allow Filter during Generation = Yes

Use Only 1000 First MCD(s)

Allow "Fuzzy" Generation = Yes

"Fuzzy" Generation Options were Determined Automatically

2D NMR Spectral Data Must Contain Connectivities = Real spectrum

Increase Connectivity Length when Merging Connectivities = No

Allow Bonds between Heteroatoms = No

Allow Bonds between Heteroatoms of the Same Atom Type = No

Use NMR Shifts Correlation Table = 2

Maximum bond multiplicity = 3

MCD #1 (ID = 0): (779319/0) structures have been generated and (430/0) structures stored

779319 structure(s) have been generated by Correlation Spectroscopy Based Generator and 430 structure(s) have been stored.

Generation time: 121 h 47 m 01 s (Check: 0 s, Generation: 121 h 47 m 00 s 969 ms)

No (from No) connectivities have been extended during generation

Generation has been interrupted by the user (stop button pressed)

Finish: Structure Generation 09/27/2023 12:11:30
