# Supplementary material for: Gentiana capitata Buch.–Ham. ex D.Don Cell Suspension Culture as a New Source of Isosaponarin and 3,7,8-Trimethoxy-9-oxo-9H-xanthen-1-yl 6-O-β-D-ribopyranosyl-β-D-allopyranoside and Their Effect on PC-12 Cell Viability
Source: MDPI journal article supplement (doi:10.3390/ijms25168576), 2024-08-06
Supplement: s1 [file s1]

The entire structure elucidation report  
and the elucidation protocol from the  
ACD/SE Suite tool (Advanced  
Chemistry Development, Inc.  
(ACD/Labs), Toronto, ON, Canada,  
[www.acdlabs.com](http://www.acdlabs.com)) for **compound 1**

# Structure Elucidation Report for compound 1

## Initial Data

### Composition Restrictions:

Molecular Weight = 0.000-1000.000

Double Bonds Equivalent = 0.00-100.00

Allowed Composition = C(0-100) H(0-100) O(0-20) N(0-10)

Molecular Formula = C<sub>27</sub>H<sub>32</sub>O<sub>15</sub>

### Spectral Data:

standard <sup>1</sup>H - 20 peaks

merged <sup>1</sup>H - 20 peaks

standard <sup>13</sup>C - 27 peaks

merged <sup>13</sup>C - 27 peaks

COSY <sup>1</sup>H-<sup>1</sup>H - 25 peaks

HSQC-DEPT <sup>13</sup>C-<sup>1</sup>H - 20 peaks

HMBC <sup>13</sup>C-<sup>1</sup>H - 49 peaks

## Most Probable Structure

Following structure has been placed to the first position after spectra calculation

## Structure Elucidation Report for compound 1 (Page 2)

## Carbon Assignment

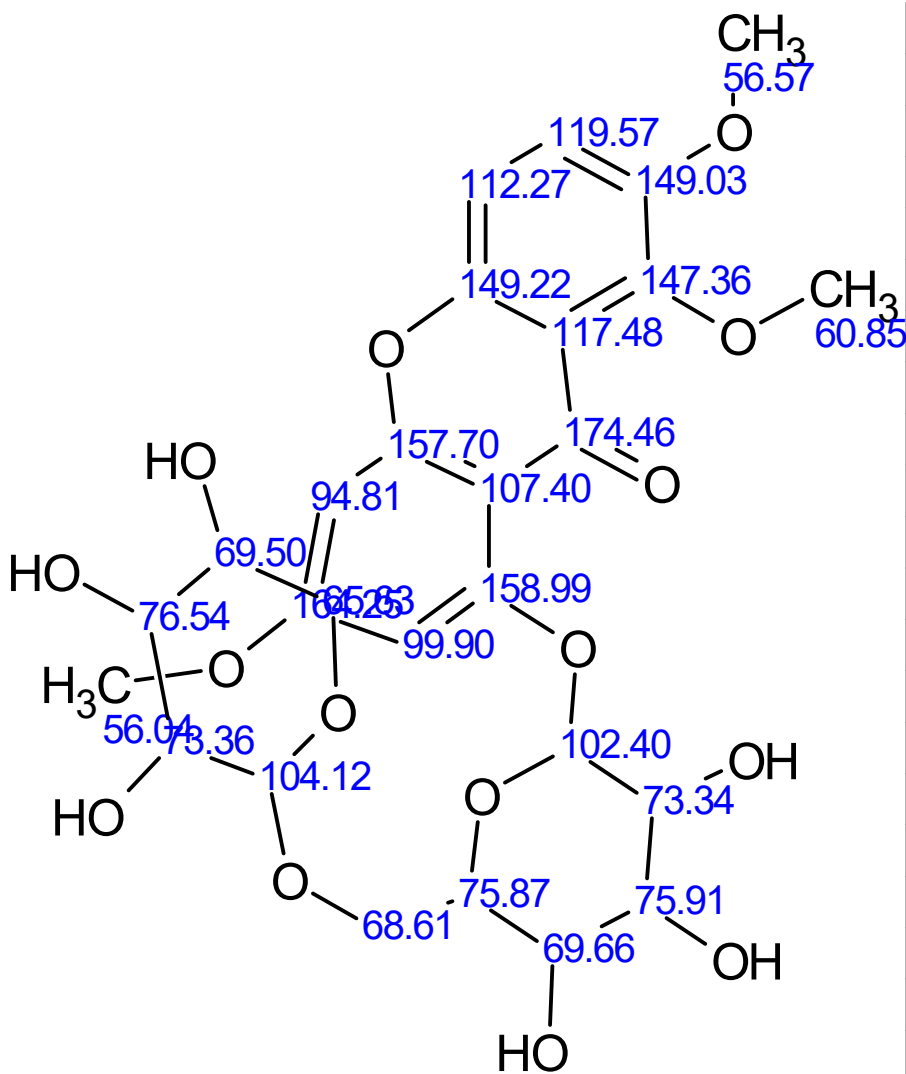

| #  | N  | Shift (ppm) | Atoms | XHn    |
|----|----|-------------|-------|--------|
| 1  | 1  | 56.035      | 1     | CH3(q) |
| 2  | 2  | 56.568      | 1     | CH3(q) |
| 3  | 3  | 60.848      | 1     | CH3(q) |
| 4  | 4  | 65.632      | 1     | CH2(t) |
| 5  | 5  | 68.609      | 1     | CH2(t) |
| 6  | 6  | 69.496      | 1     | CH(d)  |
| 7  | 7  | 69.659      | 1     | CH(d)  |
| 8  | 8  | 73.343      | 1     | CH(d)  |
| 9  | 9  | 73.356      | 1     | CH(d)  |
| 10 | 10 | 75.868      | 1     | CH(d)  |
| 11 | 11 | 75.906      | 1     | CH(d)  |
| 12 | 12 | 76.542      | 1     | CH(d)  |
| 13 | 13 | 94.806      | 1     | CH(d)  |
| 14 | 14 | 99.900      | 1     | CH(d)  |
| 15 | 15 | 102.398     | 1     | CH(d)  |
| 16 | 16 | 104.123     | 1     | CH(d)  |
| 17 | 19 | 107.405     | 1     | C(s)   |
| 18 | 17 | 112.269     | 1     | CH(d)  |
| 19 | 20 | 117.476     | 1     | C(s)   |
| 20 | 18 | 119.566     | 1     | CH(d)  |
| 21 | 21 | 147.359     | 1     | C(s)   |
| 22 | 22 | 149.026     | 1     | C(s)   |
| 23 | 23 | 149.216     | 1     | C(s)   |
| 24 | 24 | 157.699     | 1     | C(s)   |
| 25 | 25 | 158.994     | 1     | C(s)   |
| 26 | 26 | 164.253     | 1     | C(s)   |

## Proton Assignment

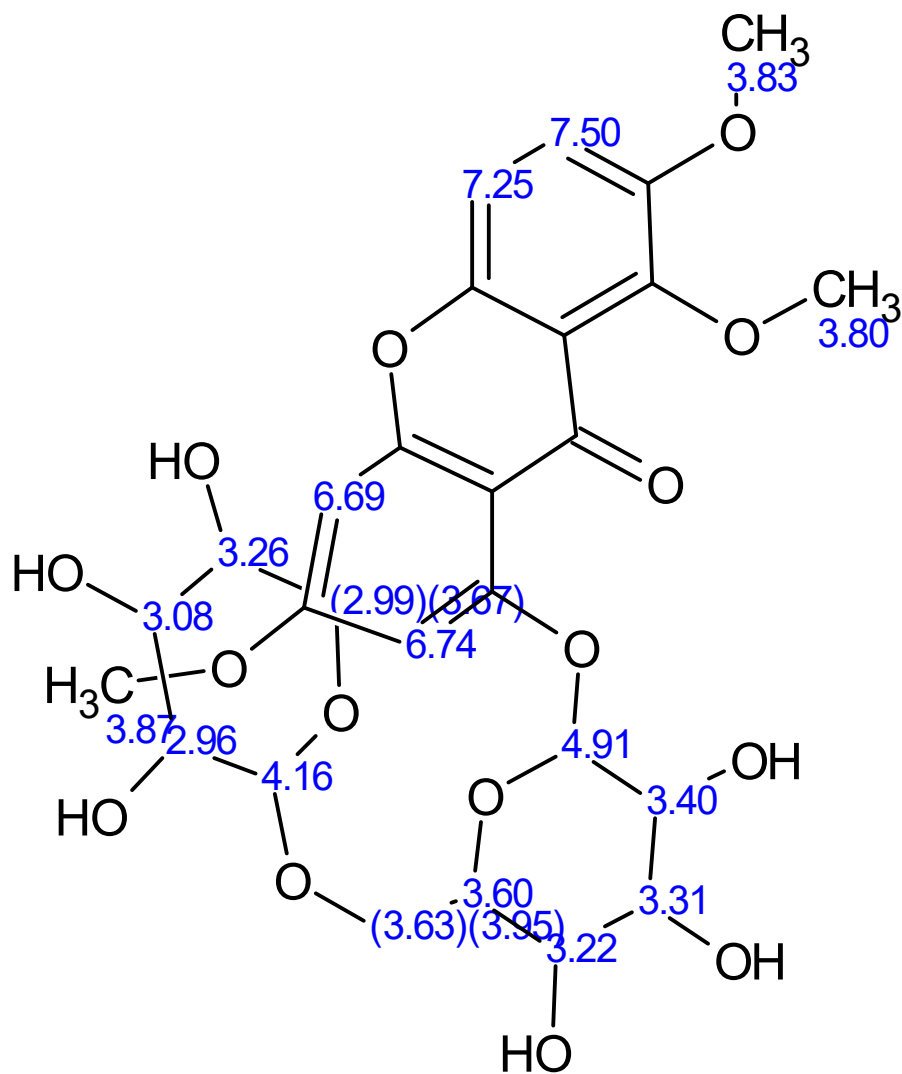

| #  | N  | Mark | Shift (ppm) | Protons |
|----|----|------|-------------|---------|
| 1  | 9  |      | 2.959       | 1       |
| 2  | 4  |      | 2.987       | 1       |
| 3  | 12 |      | 3.077       | 1       |
| 4  | 7  |      | 3.220       | 1       |
| 5  | 6  |      | 3.256       | 1       |
| 6  | 11 |      | 3.312       | 1       |
| 7  | 8  |      | 3.404       | 1       |
| 8  | 10 |      | 3.600       | 1       |
| 9  | 5  |      | 3.627       | 1       |
| 10 | 4  |      | 3.666       | 1       |
| 11 | 3  |      | 3.795       | 3       |
| 12 | 2  |      | 3.833       | 3       |
| 13 | 1  |      | 3.869       | 3       |
| 14 | 5  |      | 3.950       | 1       |
| 15 | 16 |      | 4.161       | 1       |
| 16 | 15 |      | 4.911       | 1       |
| 17 | 13 |      | 6.694       | 1       |
| 18 | 14 |      | 6.744       | 1       |
| 19 | 17 |      | 7.247       | 1       |

## Generated Structures

1 (ID=425)

**The Best Structure**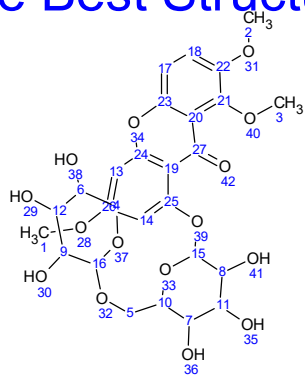 $d_N(^{13}\text{C}+^1\text{H})$ : 5.089

2 (ID=418)

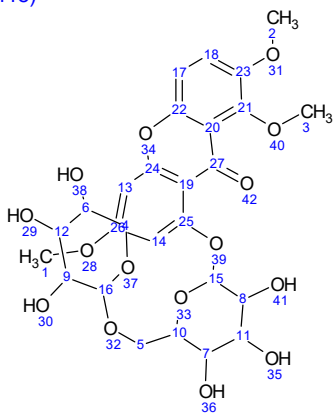 $d_N(^{13}\text{C}+^1\text{H})$ : 5.103

3 (ID=426)

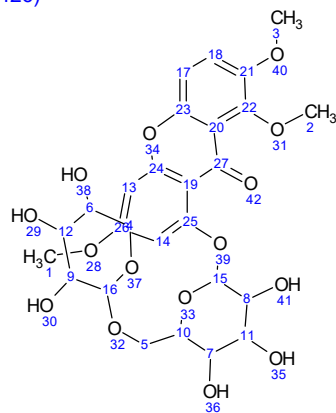 $d_N(^{13}\text{C}+^1\text{H})$ : 5.383

4 (ID=378)

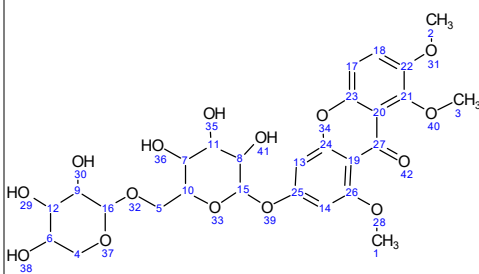 $d_N(^{13}\text{C}+^1\text{H})$ : 5.476

5 (ID=371)

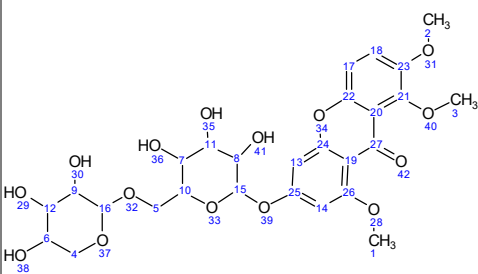 $d_N(^{13}\text{C}+^1\text{H})$ : 5.490

6 (ID=420)

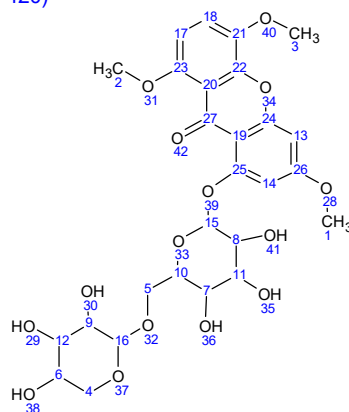 $d_N(^{13}\text{C}+^1\text{H})$ : 5.725

# Structure Elucidation Report for compound 1 (Page 5)

7 (ID=379)

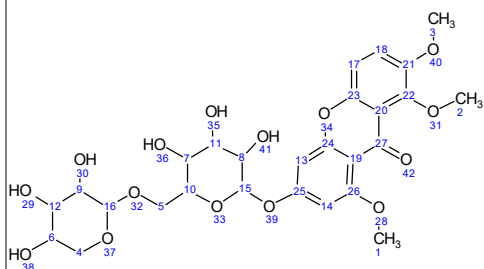

$d_N(^{13}C+^1H)$ : 5.770

8 (ID=419)

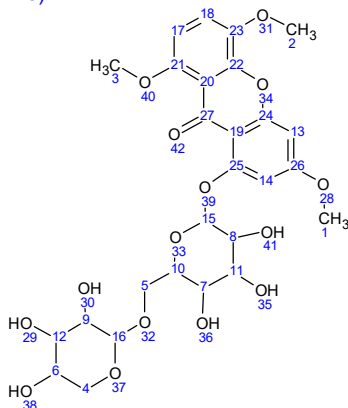

$d_N(^{13}C+^1H)$ : 5.863

9 (ID=417)

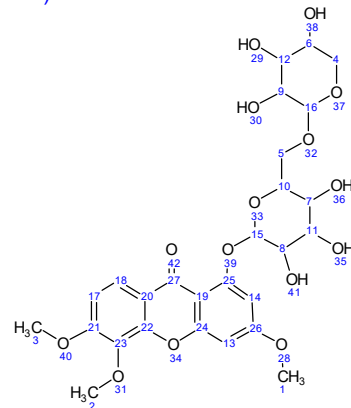

$d_N(^{13}C+^1H)$ : 5.903

10 (ID=373)

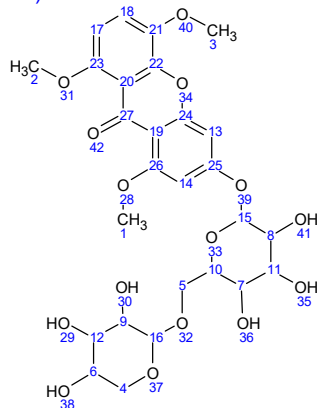

$d_N(^{13}C+^1H)$ : 6.134

11 (ID=372)

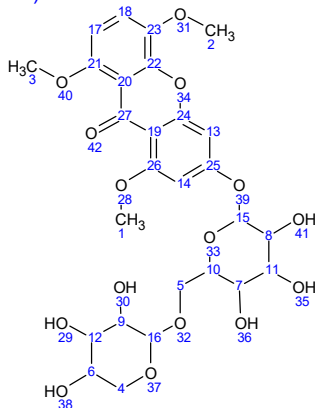

$d_N(^{13}C+^1H)$ : 6.271

12 (ID=421)

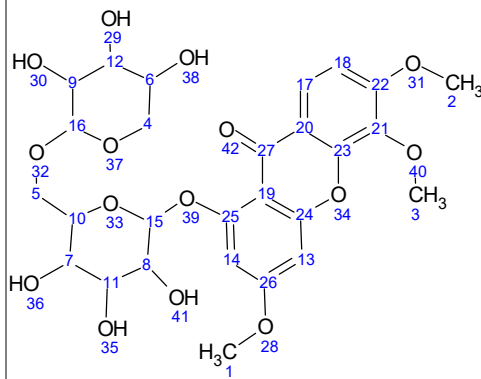

$d_N(^{13}C+^1H)$ : 6.286

# Structure Elucidation Report for compound 1 (Page 6)

13 (ID=370)

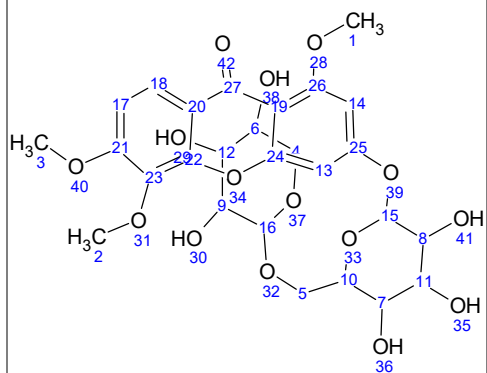

$d_N(^{13}C+^1H)$ : 6.309

14 (ID=337)

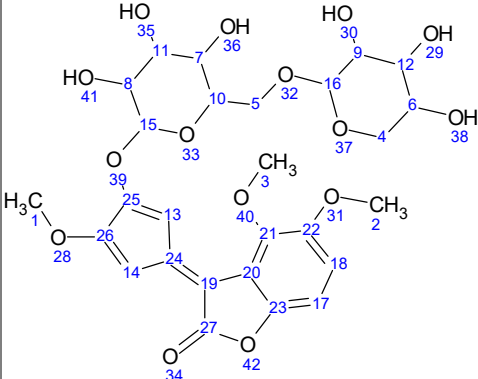

$d_N(^{13}C+^1H)$ : 6.654

15 (ID=336)

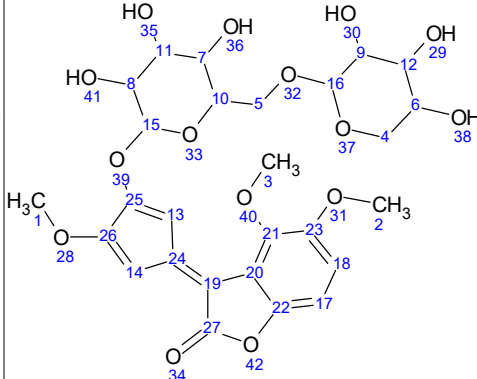

$d_N(^{13}C+^1H)$ : 6.654

16 (ID=374)

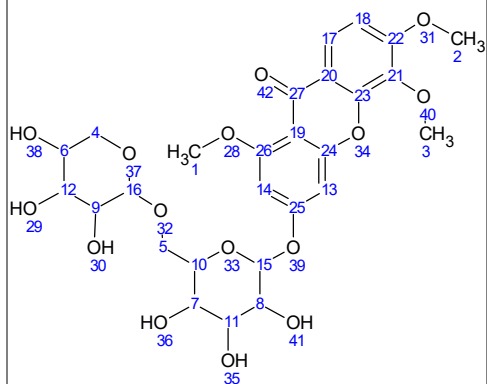

$d_N(^{13}C+^1H)$ : 6.692

17 (ID=422)

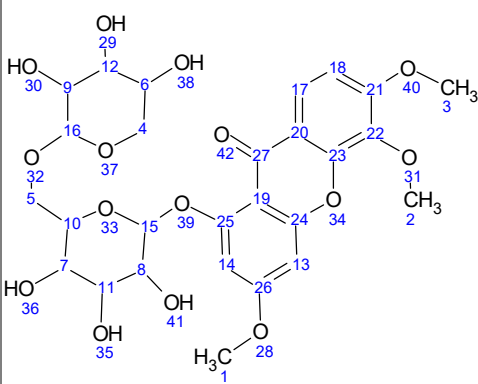

$d_N(^{13}C+^1H)$ : 6.726

18 (ID=301)

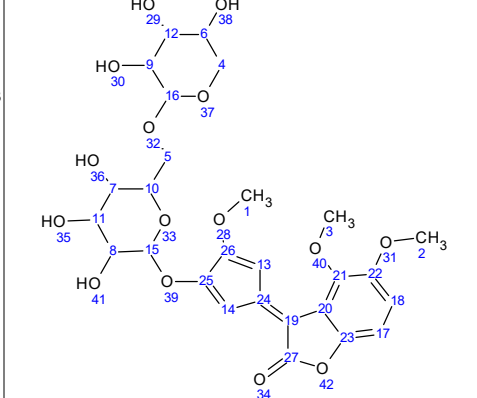

$d_N(^{13}C+^1H)$ : 6.799

# Structure Elucidation Report for compound 1 (Page 7)

|                                                                                                       |                                                                                                        |                                                                                                         |
|-------------------------------------------------------------------------------------------------------|--------------------------------------------------------------------------------------------------------|---------------------------------------------------------------------------------------------------------|
| <p>19 (ID=300)</p> 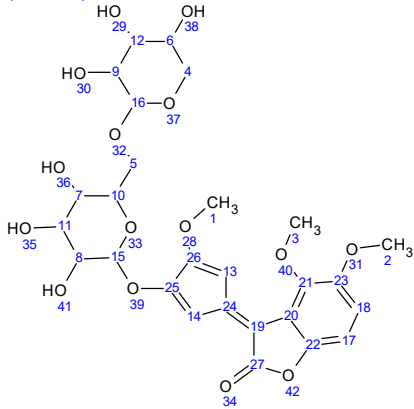  | <p>20 (ID=338)</p>   | <p>21 (ID=375)</p>   |
| <p><math>d_N(^{13}\text{C}+^1\text{H})</math>: 6.799</p>                                              | <p><math>d_N(^{13}\text{C}+^1\text{H})</math>: 7.095</p>                                               | <p><math>d_N(^{13}\text{C}+^1\text{H})</math>: 7.133</p>                                                |
| <p>22 (ID=393)</p>  | <p>23 (ID=394)</p>  | <p>24 (ID=302)</p>  |
| <p><math>d_N(^{13}\text{C}+^1\text{H})</math>: 7.192</p>                                              | <p><math>d_N(^{13}\text{C}+^1\text{H})</math>: 7.192</p>                                               | <p><math>d_N(^{13}\text{C}+^1\text{H})</math>: 7.236</p>                                                |

## Appendix (Additional Data)

### Experimental Spectra Data

standard 1H



# Structure Elucidation Report for compound 1 (Page 8)

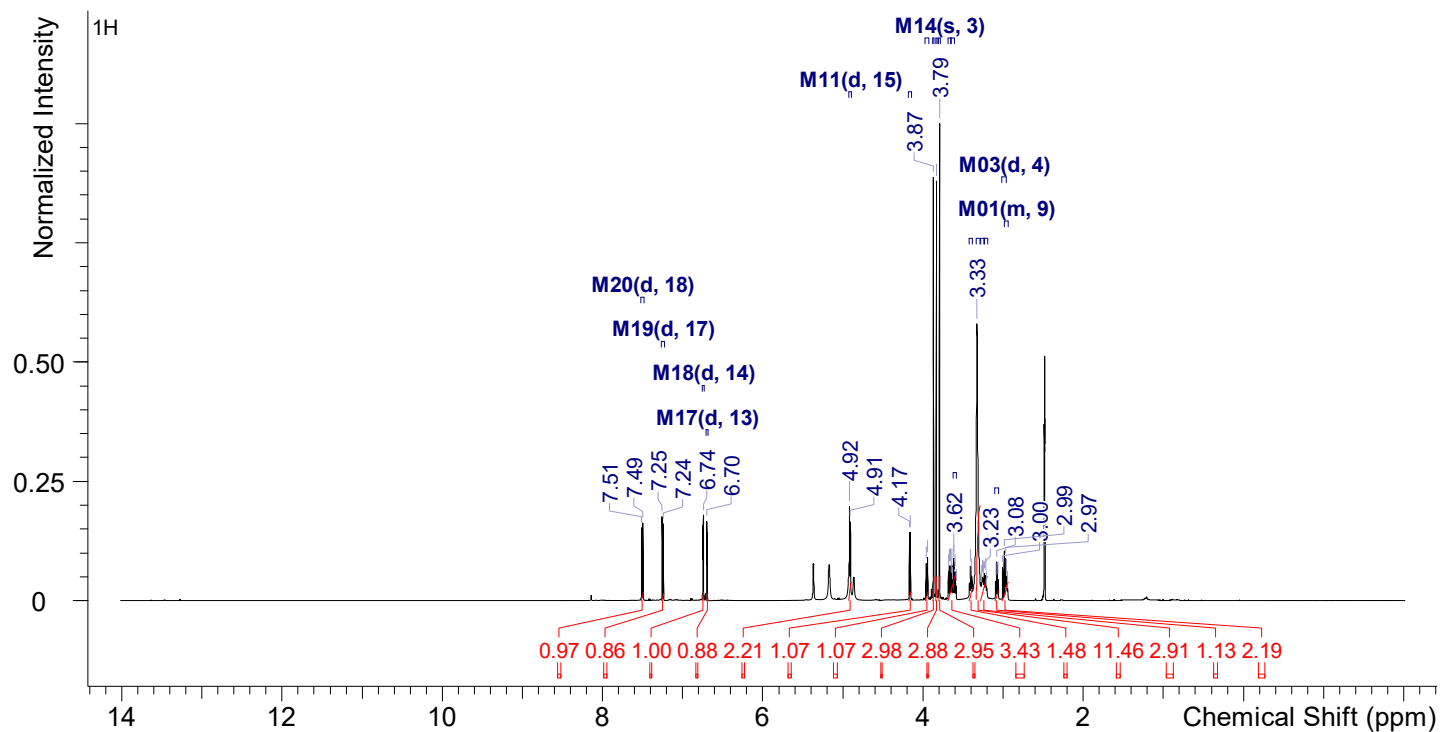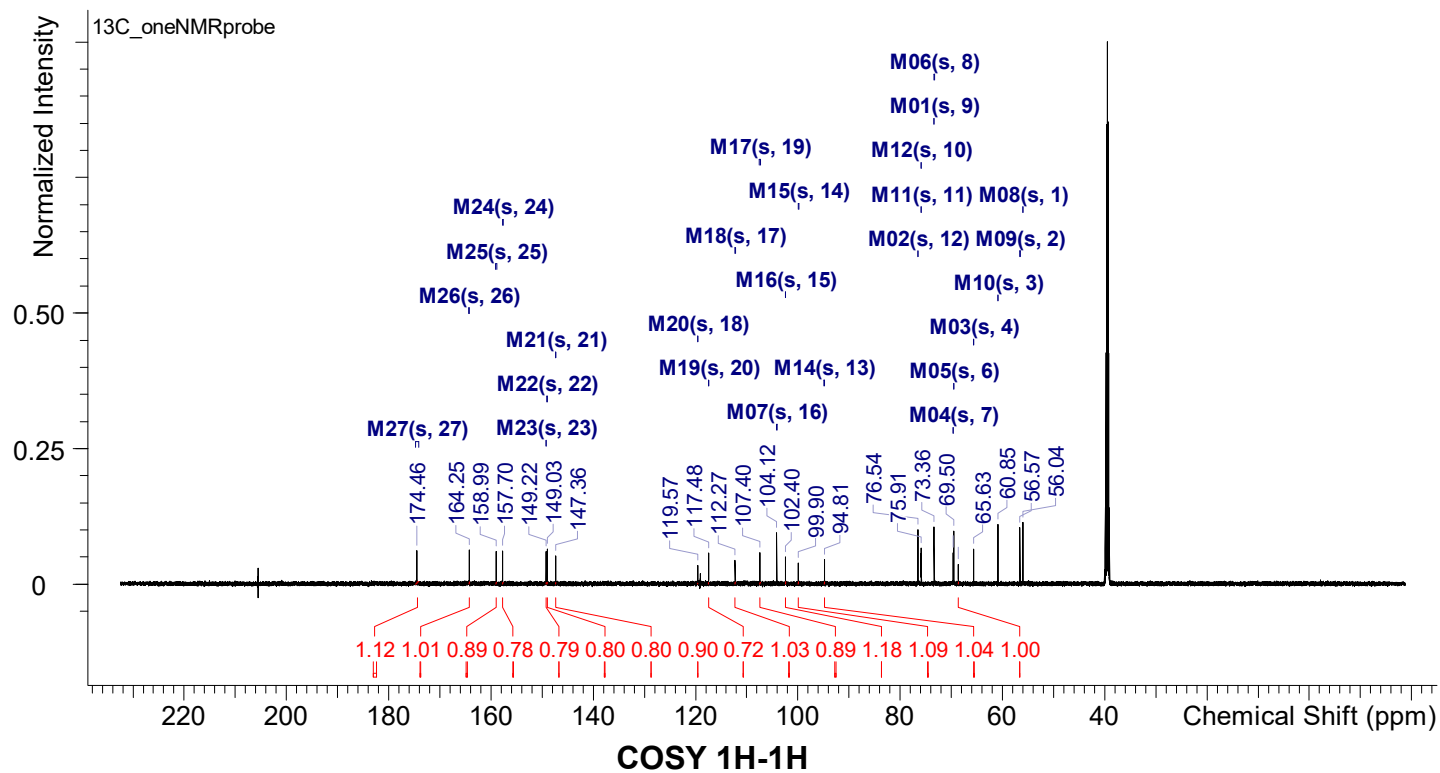

# Structure Elucidation Report for compound 1 Page 9)

cosy.fid.esp

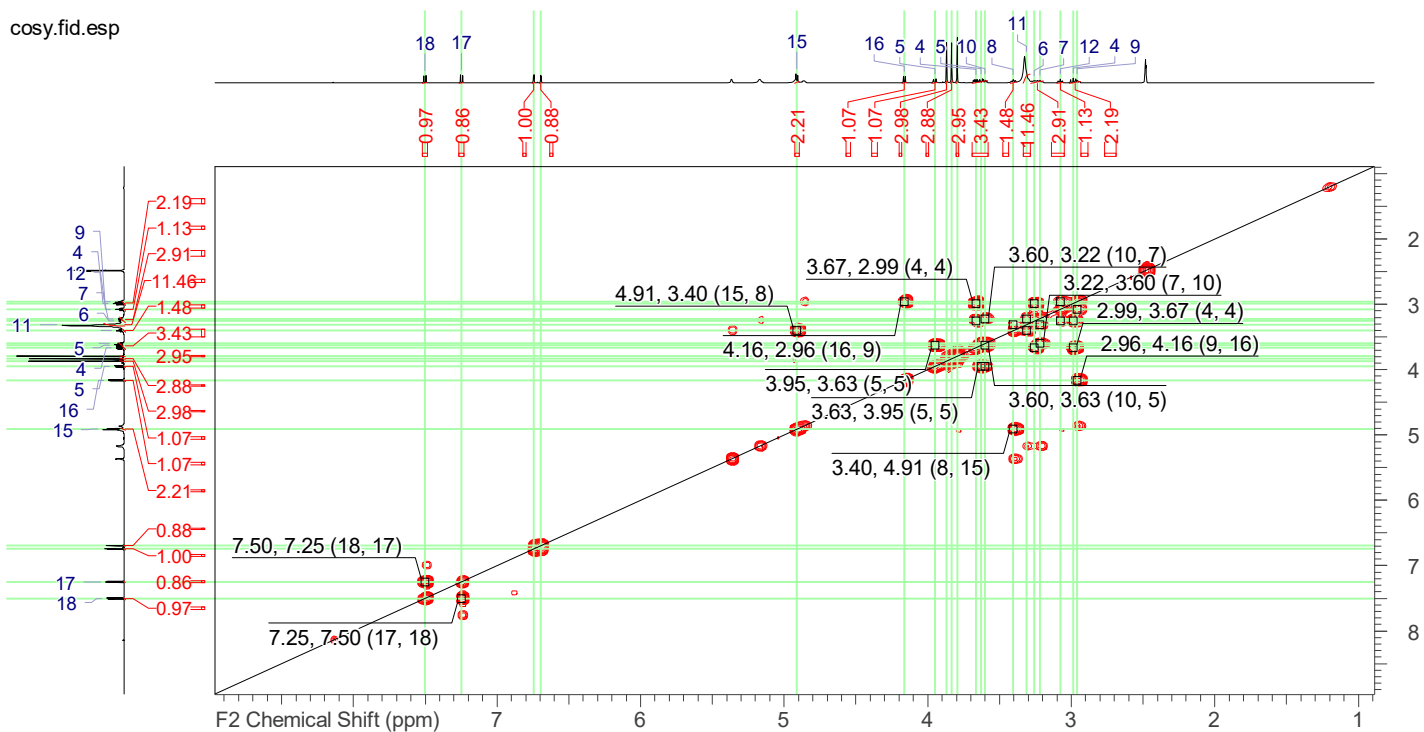

hscq.fid.esp

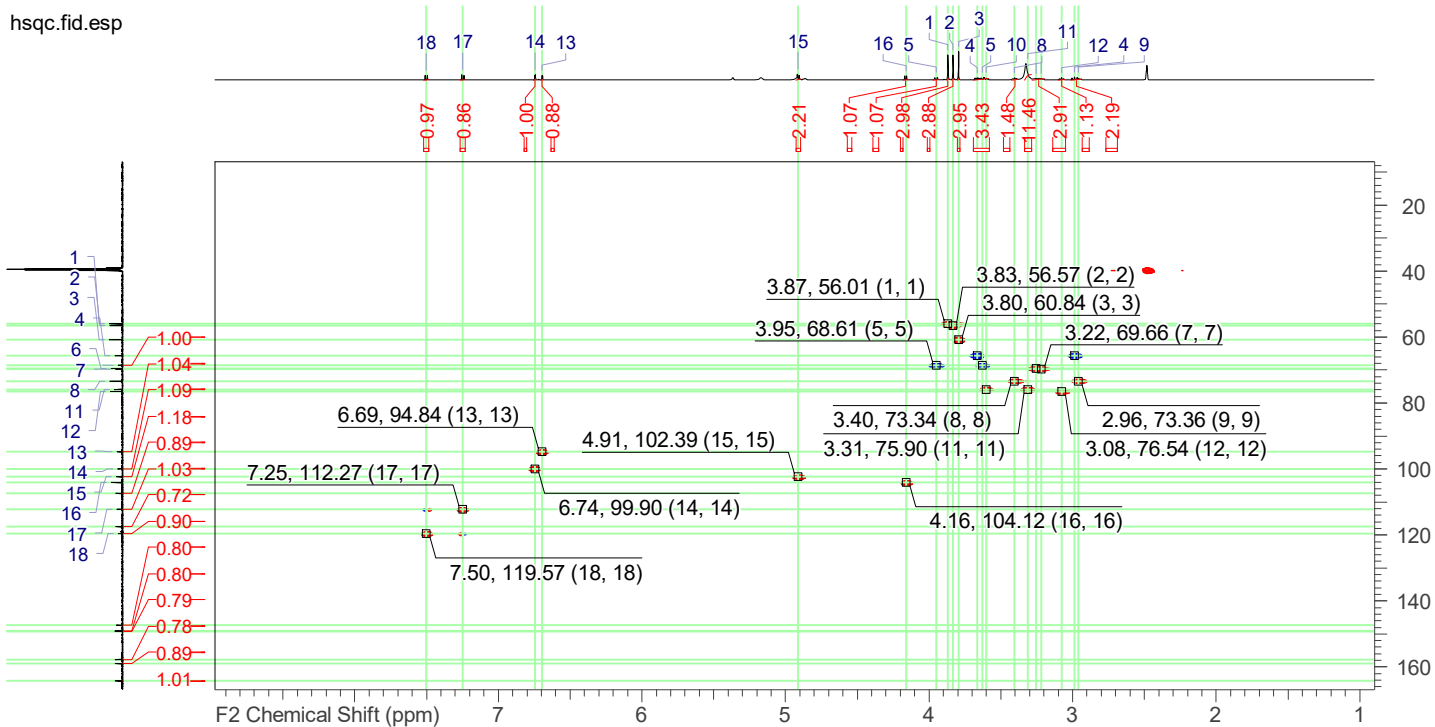

# Structure Elucidation Report for compound 1 Page 10)

hmbc.fid.esp

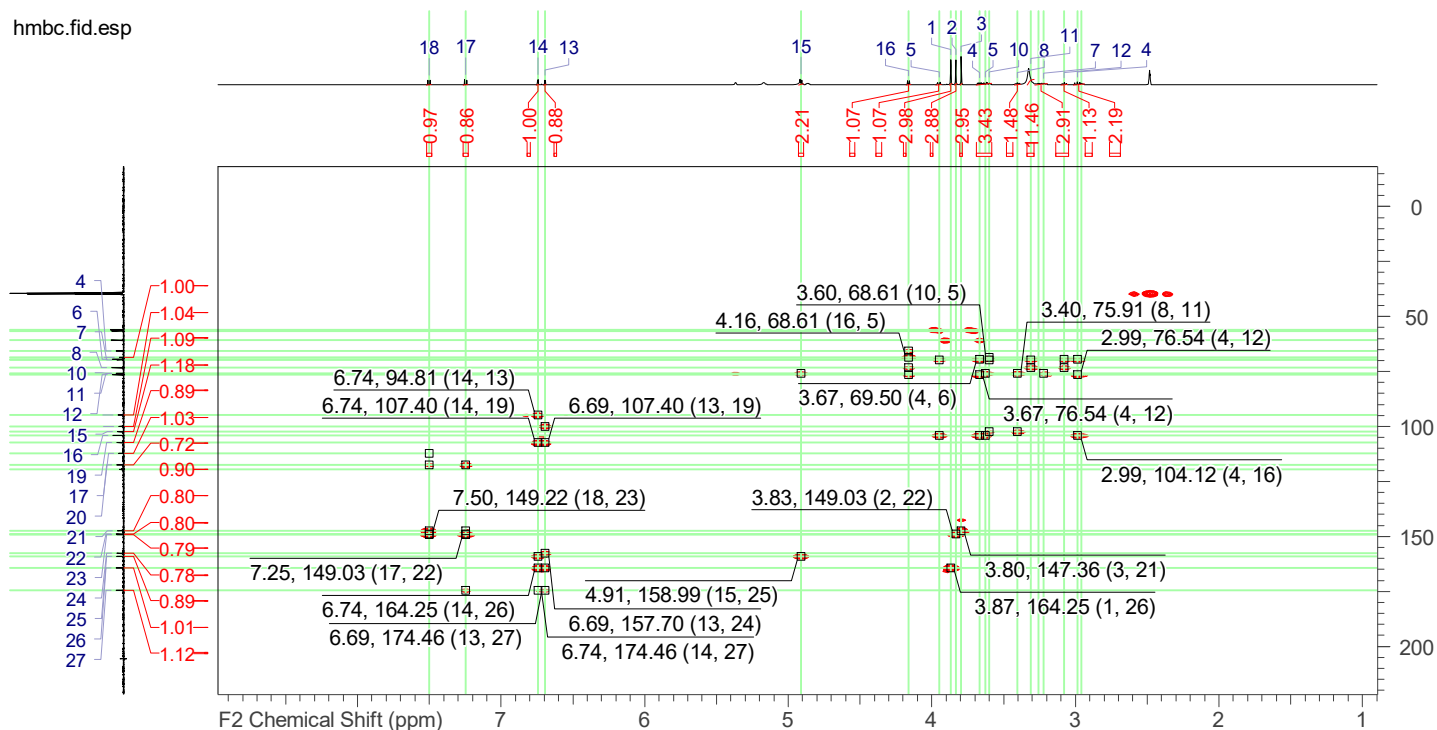

## Elucidation Protocol

Start: Structure Generation 07/26/2023 15:46:27

Correlation Spectroscopy Based Structure Generator options:

Keep Generated Structures = Yes

Clear Generated Structures List Before Generation = Yes

Add Structures Already Existing in Generated Structures List = No

Transfer Spectra to Generated Structures = Yes

Use Assignment when Removing Duplicates = Yes

Allow Filter during Generation = Yes

Use Only 1000 First MCD(s)

Allow "Fuzzy" Generation = Yes

"Fuzzy" Generation Options were Determined Automatically

2D NMR Spectral Data Must Contain Connectivities = Real spectrum

Increase Connectivity Length when Merging Connectivities = No

Allow Bonds between Heteroatoms = No

Allow Bonds between Heteroatoms of the Same Atom Type = No

Use NMR Shifts Correlation Table = 2

Maximum bond multiplicity = 3

MCD #1 (ID = 0): (197109/0) structures have been generated and (484/0) structures stored

197109 structure(s) have been generated by Correlation Spectroscopy Based Generator and 484 structure(s) have been stored.

Generation time: 2 h 09 m 15 s (Check: 5 s, Generation: 2 h 09 m 10 s 340 ms)

No (from No) connectivities have been extended during generation

Finish: Structure Generation 07/26/2023 17:55:43
